# Supplementary material for: Deciphering the Effect of Lysine Acetylation on the Misfolding and Aggregation of Human Tau Fragment 171IPAKTPPAPK180 Using Molecular Dynamic Simulation and the Markov State Model
Source: MDPI journal article supplement (doi:10.3390/ijms23052399), 2022-02-22
Supplement: s1 [file s1]

## Supplementary Materials

# Deciphering the Effect of Lysine Acetylation on the Misfolding and Aggregation of Human Tau Fragment $^{171}\text{IPAKTPPAPK}^{180}$ Using Molecular Dynamic Simulation and the Markov State Model

Syed Jawad Ali Shah <sup>1,2,†</sup>, Haiyang Zhong <sup>3,†</sup>, Qianqian Zhang <sup>1</sup> and Huanxiang Liu <sup>1,4,\*</sup>

<sup>1</sup> School of Pharmacy, Lanzhou University, Lanzhou 730000, China; syed2017@lzu.edu.cn (S.J.A.S.); zhangqq19@lzu.edu.cn (Q.Z.)

<sup>2</sup> Centre for Advanced Drug Research, Abbottabad Campus, COMSATS University Islamabad, Abbottabad 22060, Pakistan

<sup>3</sup> Department of Chemistry, Lanzhou University, Lanzhou 730000, China; zhonghy14@lzu.edu.cn

<sup>4</sup> School of Applied Science, Macao Polytechnic Institute, Macao SAR, China

\* Correspondence: hxliu@lzu.edu.cn; Tel./Fax: +86-931-891-5686

† These authors contributed equally to this work.

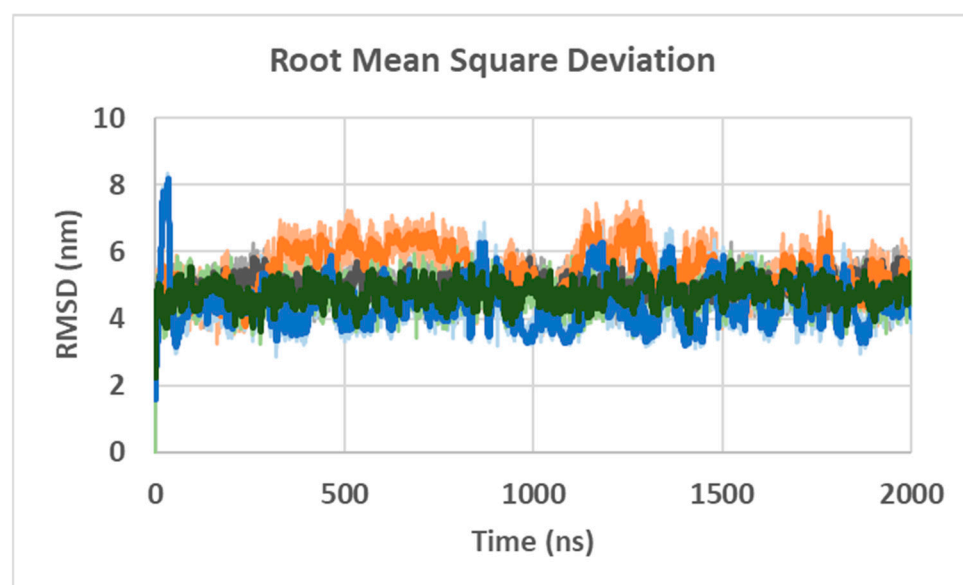

**Figure S1.** RMSD profile of Differently Modified 16-mer of  $^{171}\text{IPAKTPPAPK}^{180}$ . The WT non-modified peptides, acetylated K174, acetyl-mimic KQ peptides and deacetyl-mimic KR is shown in grey, red, blue, and green color respectively.

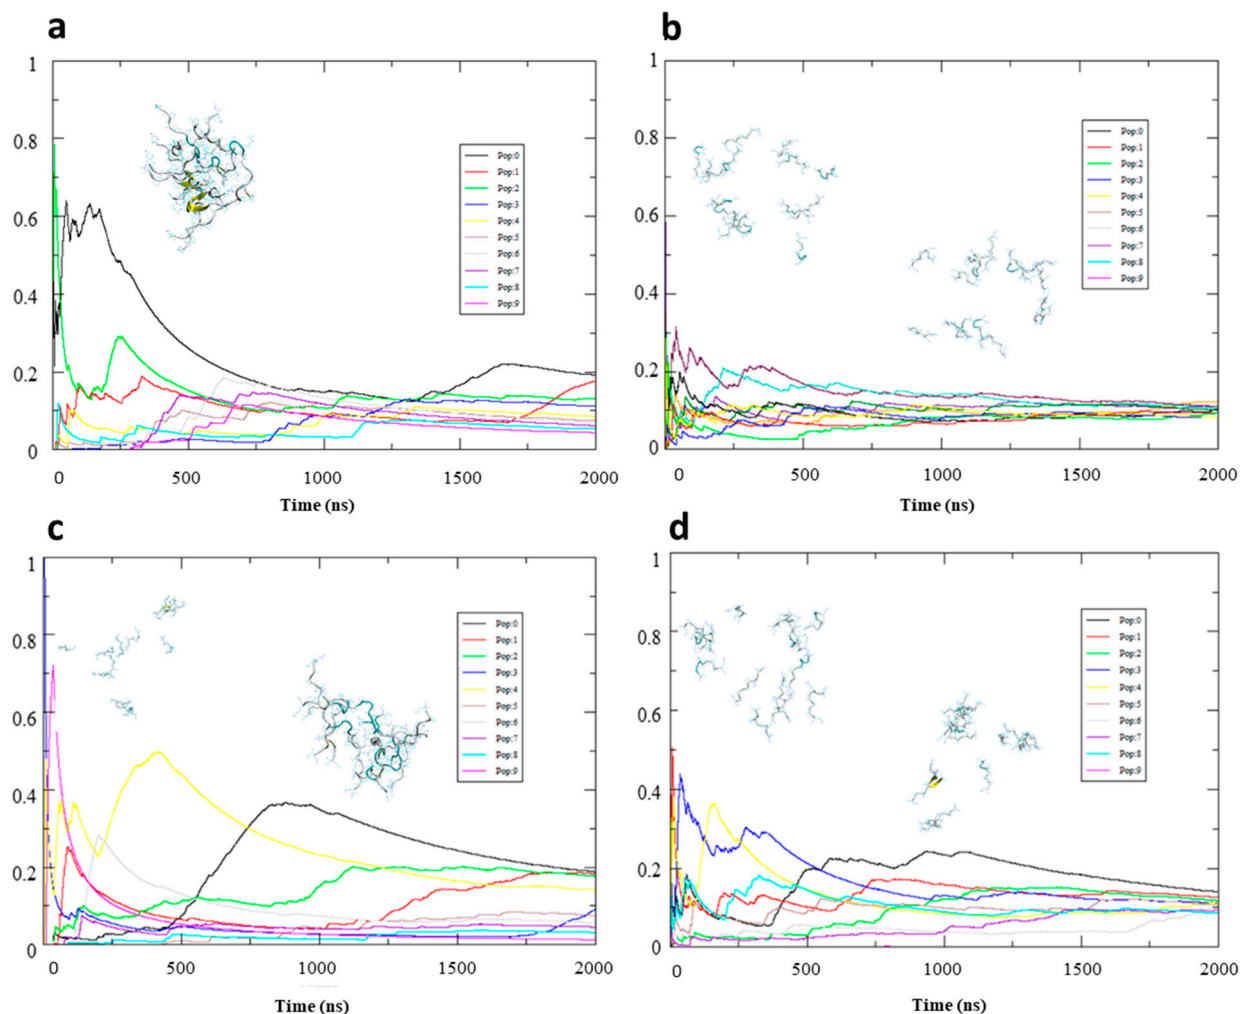

**Figure S2. Time-lapse Cluster Analysis of Differently Modified 16-mer of  $^{171}\text{IPAKTPPAPK}^{180}$ .** (a) acetylated K174 16-mers, (b) non-modified WT 16-mers, (c) The acetyl-mimic KQ mutated 16-mers and (d) the deacetyl-mimic KR mutated 16-mers. Different Cluster populations are shown in different colors.

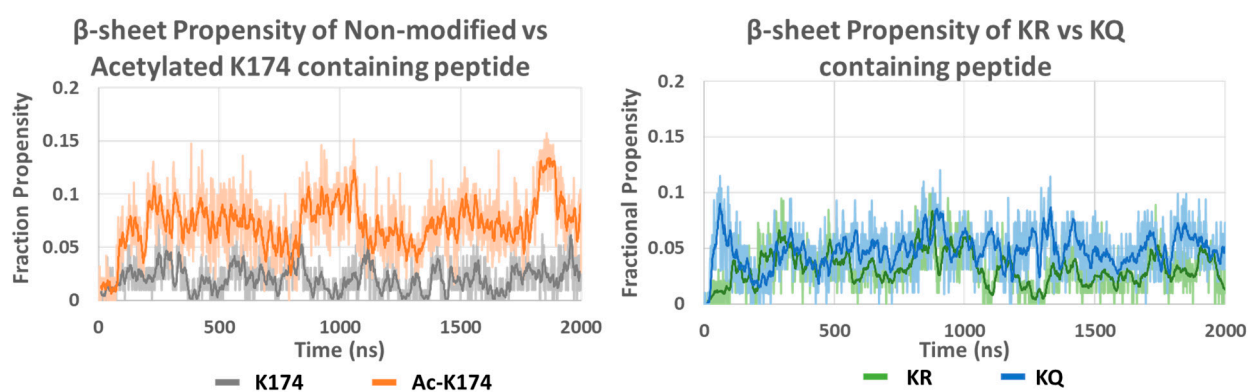

**Figure S3.  $\beta$ -sheets propensity of differently modified  $^{171}\text{IPAKTPPAPK}^{180}$  tau fragments as predicted by DSSP analysis.** The non-modified WT, ac-K174, KQ and KR is shown in grey, orange, blue and green color, respectively.

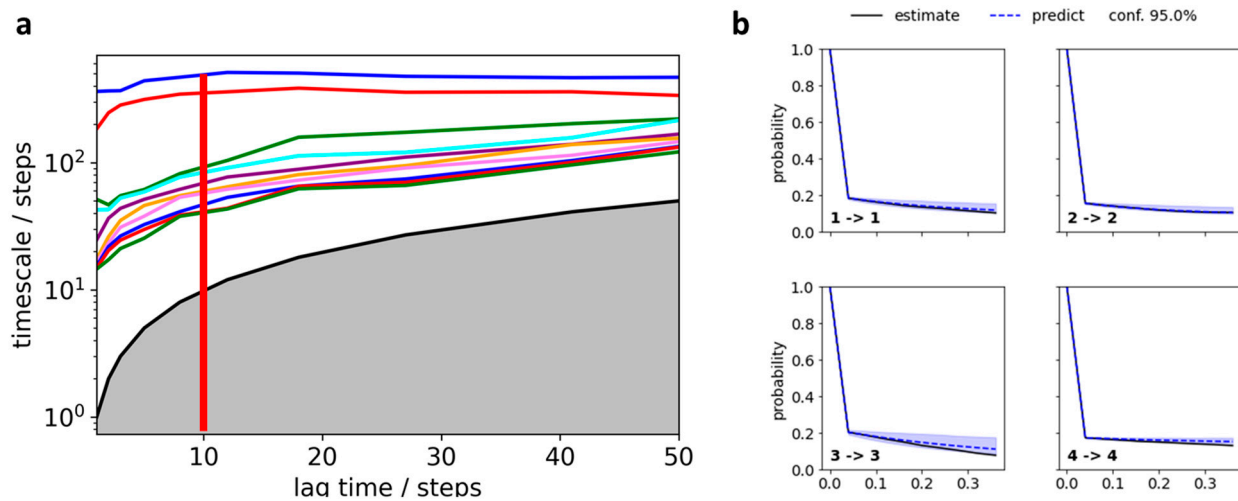

**Figure S4. Markov state model validation for C3-C13 Dimer.** (a) Implied relaxation timescale as a function of lag time  $\tau = 10$  ns (10 steps) is appropriate and (b) Chapman-Kolmogorov test curves obtained by lumping 300 microstates into 5 macrostates.
